# Supplementary material
Source: Royal Society of Chemistry journal article supplement (doi:10.1039/d5cp04653j)
Supplement: d5cp04653j2.pdf [file d5cp04653j2.pdf]

# Electronic, Topological, and Magneto-Optical Properties of NiFeMnSn: A First-Principles Study

Arockia Oliver Raja T,<sup>†</sup> Anusree CV,<sup>†</sup> G. Vaitheeswaran,<sup>\*,‡</sup> M. Manivel Raja,<sup>¶</sup> and  
V. Kanchana<sup>\*,†</sup>

<sup>†</sup>*Department of Physics, Indian Institute of Technology Hyderabad, Kandi, Medak-502285,  
Telangana, India.*

<sup>‡</sup>*School of Physics, University of Hyderabad, Prof. C. R. Rao Road, Gachibowli,  
Hyderabad-500046, Telangana, India.*

<sup>¶</sup>*Advanced Magnetic Group, Defence Metallurgical Research Laboratory, Kanchanbag P.O-  
500058, Hyderabad, Telangana, India*

E-mail: [vaithee@uohyd.ac.in](mailto:vaithee@uohyd.ac.in); [kanchana@phy.iith.ac.in](mailto:kanchana@phy.iith.ac.in)

# Mechanical Properties

Table S1: Mechanical properties of NiFeMnSn

| <b>Mechanical properties</b> | <b>Voigt</b> | <b>Reuss</b> | <b>Hill</b> |
|------------------------------|--------------|--------------|-------------|
| Bulk modulus (GPa)           | 155.12       | 155.12       | 155.12      |
| Shear modulus (GPa)          | 76.96        | 62.65        | 69.80       |
| Young's modulus (GPa)        | 198.13       | 165.65       | 181.89      |
| Poisson's ratio (GPa)        | 0.28         | 0.32         | 0.30        |
| Bulk/Shear (Pugh's) ratio    | 2.01         | 2.47         | 2.22        |

Table S2: Mirror parity of Mn atomic orbitals with respect to the mirror plane  $M_{(110)}$  along the W-K-U high-symmetry path.

| <b>Orbital Type</b> | <b>Orbital</b>    | <b>Functional Form</b> | <b>Mirror Parity</b> |
|---------------------|-------------------|------------------------|----------------------|
| $d$                 | $d_{xy}$          | $xy$                   | +1                   |
|                     | $d_{z^2}$         | $z^2$                  | +1                   |
|                     | $d_{x^2-y^2}$     | $x^2 - y^2$            | -1                   |
|                     | $d_{xz}$          | $xz$                   | -                    |
|                     | $d_{yz}$          | $yz$                   | -                    |
| $d$ (combinations)  | $d_{xz} + d_{yz}$ | $xz + yz$              | +1                   |
|                     | $d_{xz} - d_{yz}$ | $xz - yz$              | -1                   |

Table S3: Mirror parity of atomic orbitals with respect to the mirror plane  $M_{\bar{1}\bar{1}0}$  relevant for the X-W-U plane.

| <b>Orbital Type</b> | <b>Orbital</b>    | <b>Mirror Parity</b> |
|---------------------|-------------------|----------------------|
| $d$                 | $d_{xy}$          | +1                   |
|                     | $d_{z^2}$         | +1                   |
|                     | $d_{x^2-y^2}$     | -1                   |
|                     | $d_{xz}$          | -                    |
|                     | $d_{yz}$          | -                    |
| $d$ (combinations)  | $d_{xz} + d_{yz}$ | +1                   |
|                     | $d_{xz} - d_{yz}$ | -1                   |

Table S4: Mirror parity of atomic orbitals with respect to the mirror plane  $M_z$ , relevant for the  $X - \Gamma - K$  path.

| <b>Orbital Type</b> | <b>Orbital</b> | <b>Mirror Parity</b> |
|---------------------|----------------|----------------------|
| $d$                 | $d_{xy}$       | +1                   |
|                     | $d_{x^2-y^2}$  | +1                   |
|                     | $d_{z^2}$      | +1                   |
|                     | $d_{xz}$       | -1                   |
|                     | $d_{yz}$       | -1                   |

Table S5: Momentum coordinates ( $k_x, k_y, k_z$ ) and chirality of the Weyl points obtained after including spin-orbit coupling (SOC). All  $k$  values are given in reciprocal lattice units.

| <u>S.No.</u> | <u>Weyl Point</u> | <u><math>k_x</math></u> | <u><math>k_y</math></u> | <u><math>k_z</math></u> | <u>Chirality</u> |
|--------------|-------------------|-------------------------|-------------------------|-------------------------|------------------|
| 1            | W1+               | 0.090520                | 0.164950                | -0.652880               | 1                |
| 2            | W1-               | 0.101470                | 0.163370                | -0.643380               | -1               |
| 3            | W2+               | 0.003890                | 0.501820                | -0.012800               | 1                |
| 4            | W2-               | 0.005120                | 0.500460                | 0.016370                | -1               |
| 5            | W3+               | 0.500390                | 0.000460                | -0.020290               | 1                |
| 6            | W3-               | 0.501960                | 0.002610                | 0.011890                | -1               |
| 7            | W4-               | 0.161310                | 0.177900                | -0.538490               | -1               |
| 8            | W4+               | 0.144310                | 0.207580                | -0.534200               | 1                |
| 9            | W5+               | 0.007710                | -0.502880               | -0.017800               | 1                |
| 10           | W5-               | 0.008120                | -0.501180               | 0.019620                | -1               |
| 11           | W6+               | -0.500690               | -0.004140               | -0.022140               | 1                |
| 12           | W6-               | -0.502520               | -0.007100               | 0.016900                | -1               |
| 13           | W7+               | -0.148010               | -0.211020               | -0.526860               | 1                |
| 14           | W7-               | -0.164610               | -0.176300               | -0.538820               | -1               |
| 15           | W8-               | 0.214250                | -0.152650               | 0.518590                | -1               |
| 16           | W8+               | 0.176270                | -0.164920               | 0.537820                | 1                |
| 17           | W9-               | -0.218130               | 0.149040                | 0.519070                | -1               |
| 18           | W9+               | -0.174340               | 0.163280                | 0.538970                | 1                |
| 19           | W10-              | -0.479010               | -0.411880               | -0.018200               | -1               |
| 20           | W10+              | -0.469650               | -0.403610               | 0.034800                | 1                |
| 21           | W11-              | 0.408930                | -0.475410               | -0.024720               | -1               |
| 22           | W11+              | 0.405050                | -0.473530               | 0.030090                | 1                |
| 23           | W12-              | 0.159230                | -0.101700               | -0.644180               | -1               |
| 24           | W12+              | 0.133910                | -0.061600               | -0.681530               | 1                |
| 25           | W13+              | 0.109320                | 0.162400                | 0.632740                | 1                |
| 26           | W13-              | 0.070310                | 0.135490                | 0.678790                | -1               |
| 27           | W14-              | -0.121120               | 0.070240                | 0.684520                | -1               |
| 28           | W14+              | -0.159610               | 0.111910                | 0.636010                | 1                |
| 29           | W15+              | -0.267290               | 0.265690                | -0.269040               | 1                |
| 30           | W15-              | -0.272290               | 0.342290                | -0.252820               | -1               |
| 31           | W16+              | -0.669450               | 0.213830                | -0.016800               | 1                |
| 32           | W16-              | -0.701450               | 0.286380                | -0.000020               | -1               |
| 33           | W17-              | -0.266680               | -0.267920               | 0.269850                | -1               |
| 34           | W17+              | -0.346320               | -0.276220               | 0.245810                | 1                |
| 35           | W18-              | -0.207590               | -0.670780               | 0.019020                | -1               |
| 36           | W18+              | -0.284340               | -0.700570               | -0.000150               | 1                |

Table S6: Momentum coordinates ( $k_x, k_y, k_z$ ) and chirality of the Weyl points obtained after including spin-orbit coupling (SOC). All  $k$  values are given in reciprocal lattice units.

| <u>S.No.</u> | <u>Weyl Point</u> | <u><math>k_x</math></u> | <u><math>k_y</math></u> | <u><math>k_z</math></u> | <u>Chirality</u> |
|--------------|-------------------|-------------------------|-------------------------|-------------------------|------------------|
| 37           | W19-              | 0.204280                | 0.671020                | 0.022480                | -1               |
| 38           | W19+              | 0.285060                | 0.701640                | 0.000070                | 1                |
| 39           | W20-              | 0.363620                | 0.298620                | -0.213410               | -1               |
| 40           | W20+              | 0.408200                | 0.342340                | -0.142400               | 1                |
| 41           | W21+              | -0.299200               | 0.361420                | 0.214760                | 1                |
| 42           | W21-              | -0.341740               | 0.407500                | 0.143650                | -1               |
| 43           | W22+              | -0.409410               | -0.346570               | -0.137890               | 1                |
| 44           | W22-              | -0.366220               | -0.300890               | -0.209680               | -1               |
